# Supplementary material for: Industrial Trans Fatty Acids Stimulate SREBP2‐Mediated Cholesterogenesis and Promote Non‐Alcoholic Fatty Liver Disease
Source: PubMed Central journal article supplement (PMC6790681; doi:10.1002/mnfr.201900385), 2019-08-07
Supplement: MNFR-63-na-s001.pdf [file MNFR-63-na-s001.pdf]

SUPPLEMENTARY MATERIAL

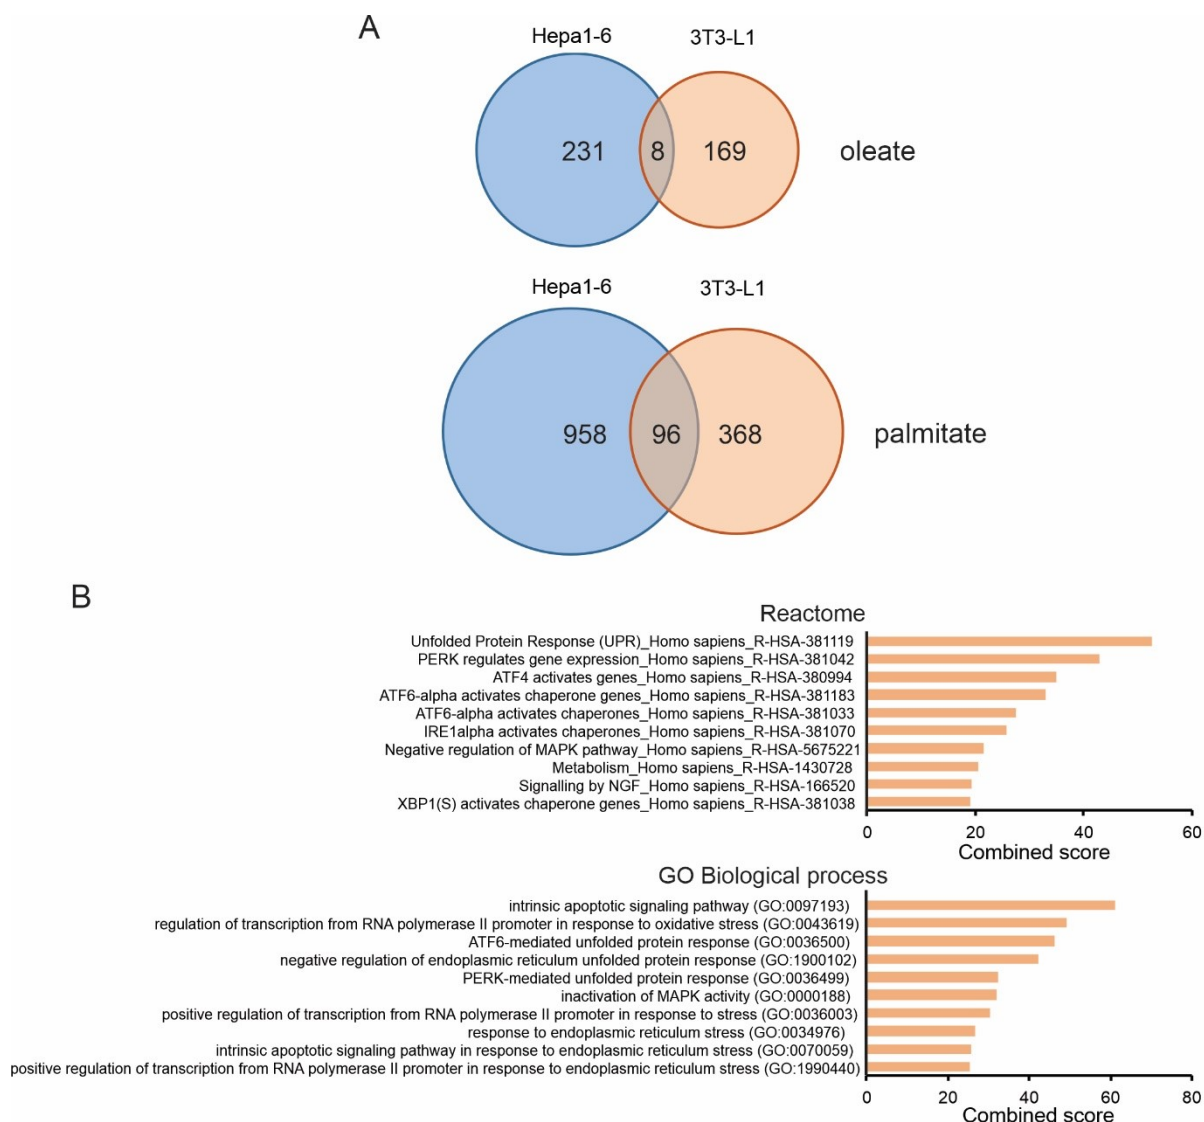

**Supplementary Figure 1. Palmitate promotes an ER stress gene expression profile in differentiated 3T3-L1 and Hepa1-6 cells.** Differentiated 3T3-L1 cells were treated with 1 mM fatty acids for 24 hours. Hepa1-6 cells were treated with 500  $\mu$ M fatty acids for 24 hours. (A) Venn diagram based on transcriptomics analysis showing the number of genes upregulated by oleate or palmitate by at least 1.5-fold. (B) Pathway analysis by Enrichr of the 96 genes commonly upregulated by palmitate in differentiated 3T3-L1 and Hepa1-6 cells.

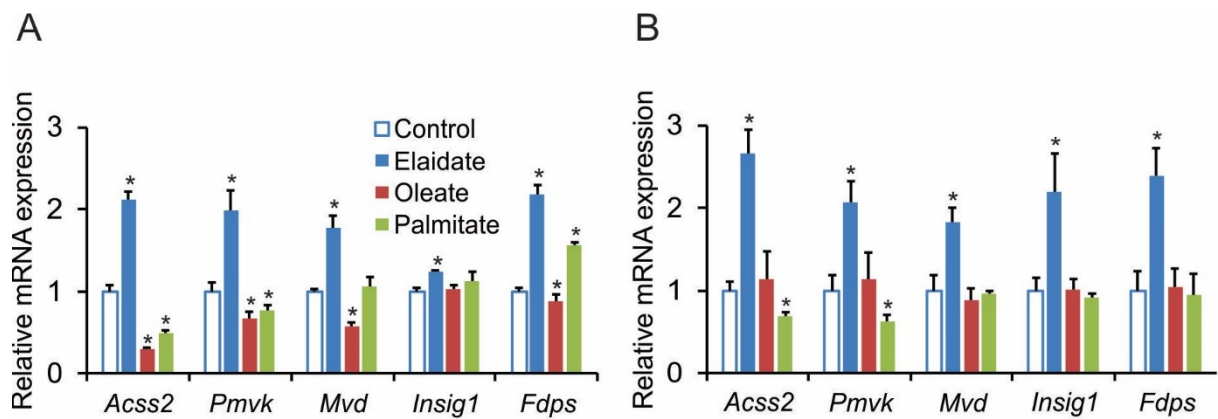

**Supplementary Figure 2. Elaidate induces cholesterologenic genes in 3T3-L1 cells.** (A) Relative mRNA expression of cholesterol synthesis genes in undifferentiated 3T3-L1 fibroblasts treated with 500  $\mu$ M of individual fatty acids for 24 hours. (B) Relative mRNA expression of cholesterol synthesis genes in 3T3-L1 cells that were differentiated in the presence of 500  $\mu$ M of individual fatty acids. mRNA expression was normalized to *36b4*. Data are mean  $\pm$  SD. \* $p < 0.05$  relative to control.

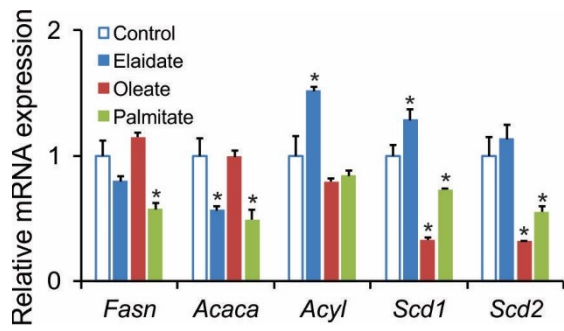

**Supplementary Figure 3.** Relative mRNA expression of target genes of SREBP1c involved in fatty acid synthesis in Hepa1-6 cells treated with 500 μM of individual fatty acids for 24 hours. mRNA expression was normalized to *36b4*. Data are mean ± SD. \*p < 0.05 relative to control condition.

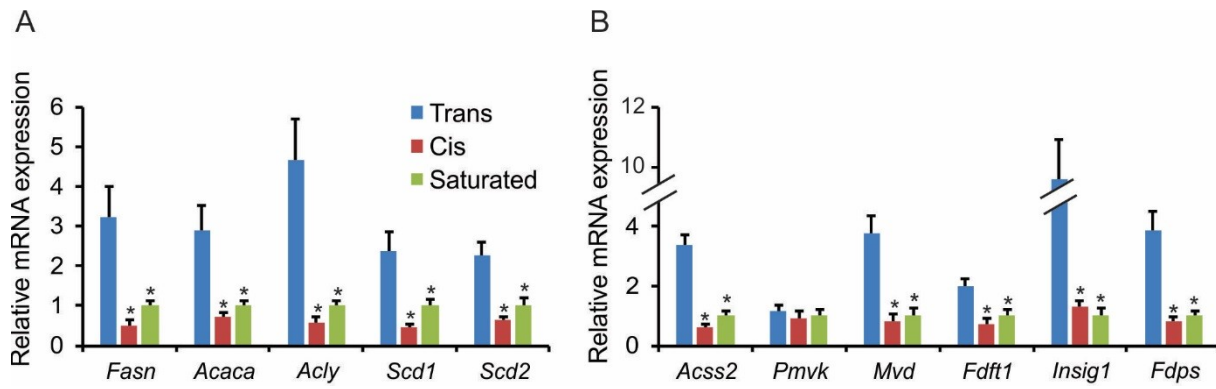

**Supplementary Figure 4. Trans diet induces lipogenic and cholesterogenic genes in inguinal adipose tissue.**

(A-B) Relative mRNA expression of fatty acid synthesis genes (A) and cholesterol synthesis genes (B) in the inguinal adipose tissue of mice fed Trans, Cis and Saturated diets. mRNA expression was normalized to *36b4*. N=8 mice/group. Data are mean  $\pm$  SEM. \* $p < 0.05$  relative to Trans group.

**Supplementary Table 1: Composition of Test Diets**

| <u>Ingredients (%)</u>                     | <u>Saturated fat diet</u> | <u>Unsaturated fat diet</u> | <u>Trans fat diet</u> |
|--------------------------------------------|---------------------------|-----------------------------|-----------------------|
| Cocoa Butter                               | <b>23.3060</b>            | 0                           | 0                     |
| Canola Oil                                 | 0                         | <b>13.2265</b>              | 0                     |
| Palm Olein Oil                             | 0                         | <b>7.8536</b>               | 0                     |
| Hydrogenated Soy Oil                       | 0                         | 0                           | <b>21.0800</b>        |
| Casein- Vitamin Tested                     | 23.3060                   | 23.3059                     | 23.3060               |
| Sucrose                                    | 19.7090                   | 19.7090                     | 19.7090               |
| Maltodextrin                               | 11.6530                   | 11.6530                     | 11.6530               |
| Dextrin                                    | 8.4830                    | 8.4830                      | 8.4830                |
| Powdered Cellulose                         | 5.8270                    | 5.8270                      | 5.8270                |
| Soybean Oil                                | 2.9200                    | 2.9200                      | 2.9200                |
| Potassium Citrate, Tribasic<br>Monohydrate | 1.9230                    | 1.9230                      | 1.9230                |
| Calcium Phosphate                          | 1.5150                    | 1.5150                      | 1.5150                |
| AIN-76A Vitamin Mix                        | 1.1650                    | 1.1650                      | 1.1650                |
| DIO Mineral Mix                            | 1.1650                    | 1.1650                      | 1.1650                |
| Calcium Carbonate                          | 0.6410                    | 0.6410                      | 0.6410                |
| L-Cystine                                  | 0.3500                    | 0.3500                      | 0.3500                |
| Choline Bitartate                          | 0.2330                    | 0.2330                      | 0.2330                |
| FD&C Yellow 6 Lake (Orange)                | 0.0300                    | 0.0300                      | 0.0300                |

**Supplementary Table 2: Primer sequences of genes**

| Genes    | Forward primer             | Reverse primer          |
|----------|----------------------------|-------------------------|
| m36b4    | ATGGGTACAAGCGCGTCCTG       | GCCTTGACCTTTTCAGTAAG    |
| mFasn    | GGCATCATTGGGCACTCCTT       | GCTGCAAGCACAGCCTCTCT    |
| mAcaca   | GCCATTGGTATTGGGGCTTACC     | CCCGACCAAGGACTTTGTTG    |
| mAcyl    | CCAGTTAATCAAACGTCGAGGA     | CTTTGGCCTTGCCGACAGT     |
| mScd1    | TAGCCTGTAAAAGATTTCTGCAAACC | CCGGAGACCCTTAGATCGA     |
| mScd2    | TTCTCCCGAGAGCTAATGTTCT     | TTCTTGCGATACGCCGTGG     |
| mAcss2   | AAACACGCTCAGGGAAAATCA      | ACCGTAGATGTATCCCCCAGG   |
| mPmvk    | AAAATCCGGGAAGGACTTCGT      | AGAGCACAGATGTTACCTCCA   |
| mMvd     | ATGGCCTCAGAAAAGCCTCAG      | TGGTCGTTTTTAGCTGGTCCT   |
| mFdf1    | TCCCCTGCTGTGTAACCTCC       | TGTCTACAAATTCTGCCATCCC  |
| mInsig1  | TGTCGGTTTACTGTATCCCTGT     | GGCAAATCTAATTTGGCACTGG  |
| mFdps    | GGAGGTCCTAGAGTACAATGCC     | AAGCCTGGAGCAGTTCTACAC   |
| mXbp1s   | GAGTCCGCAGCAGGTG           | GTGTCAGAGTCCATGGGA      |
| mErn1    | ACACCGACCACCGTATCTCA       | CTCAGGATAATGGTAGCCATGTC |
| mHerpud1 | CCTGGCTTCTCTGGCTACAC       | GTCGGGACAAAAGTTCCTGA    |
| mCxcl2   | CCAACCACCAGGCTACAGG        | GCGTCACACTCAAGCTCTG     |
| mGdf15   | CTGGCAATGCCTGAACAACG       | GGTCGGGACTTGGTTCTGAG    |
| mDdit3   | CTGGAAGCCTGGTATGAGGAT      | CAGGGTCAAGAGTAGTGAAGGT  |
| mSrebp1c | GGAGCCATGGATTGCACATT       | CCTGTCTCACCCCCAGCATA    |
| mSrebp2  | CTGCAGCCTCAAGTGCAAAG       | CAGTGTGCCATTGGCTGTCT    |
| mHmgcr   | AGCTTGCCCGAATTGTATGTG      | TCTGTTGTGAACCATGTGACTTC |
| mLdlr    | GCATCAGCTTGGACAAGGTGT      | GGGAACAGCCACCATTGTTG    |
| mScap    | TGGAGCTTTTGAGACTCAGGA      | TCGATTAAGCAGGTGAGGTCG   |
| mUbx8    | GAGCAGGATCTAACTCAGGAGC     | CAGCAGCCTCCATGTTCCAG    |
| mLxra    | CTCAATGCCTGATGTTTCTCCT     | TCCAACCCTATCCCTAAAGCAA  |
| mLxrb    | CGTGGTCATCTTAGAGCCAGA      | GCTGAGCACGTTGTAGTGGAA   |
| mAbca1   | AAAACCGCAGACATCCTTCAG      | CATACCGAAACTCGTTCACCC   |

**Supplementary Table 2 continued: Primer sequences of genes**

| Genes   | Forward primer          | Reverse primer          |
|---------|-------------------------|-------------------------|
| mAbcg1  | CTTTCCTACTCTGTACCCGAGG  | CGGGGCATTCCATTGATAAGG   |
| mSoat1  | GAAGGCTCACTCATTGTGTCAGA | GTCTCGGTAAATAAGTGTAGGCG |
| mSqle   | ATAAGAAATGCGGGGATGTCAC  | ATATCCGAGAAGGCAGCGAAC   |
| hGAPDH  | GAAGGTGAAGGTCGGAGTC     | GAAGATGGTGATGGGATTTTC   |
| hSREBP1 | ACTTCCCTGGCCTATTTGACC   | GGCATGGACGGGTAAATCTT    |
| hSREBP2 | AACGGTCATTCACCCAGGTC    | GGCTGAAGAATAGGAGTTGCC   |
| hACSS2  | CAAGTGTGTCAGTTCAGCAATG  | CCACAAGCTCTGGGATCATAGG  |
| hHMGR   | GGACCCCTTTGCTTAGATGAAA  | CCACCAAGACCTATTGCTCTG   |
| hHMGS1  | CTCTTGGGATGGACGGTATGC   | GCTCCAACCTCCACCTGTAGG   |
| hMVD    | GGACCGGATTTGGCTGAATG    | CCCATCCCGTGAGTTCCTC     |
| hINSIG1 | CCTGGCATCATCGCCTGTT     | AGAGTGACATTCCTCTGGATCTG |
| hSQLE   | TGACAATTCTCATCTGAGGTCCA | CAGGGATACCCTTTAGCAGTTTT |
| hLDLR   | GACGTGGCGTGAACATCTG     | CTGGCAGGCAATGCTTTGG     |

**Supplementary Table 3: Detailed fatty acid profile of diets**

| Fatty acids                       | Saturated | Cis-Unsat | Trans-Unsat |
|-----------------------------------|-----------|-----------|-------------|
| C 14:0                            | 0.18      | 0.44      | 0.14        |
| C 14:1 9t                         | 0         | 0         | 0           |
| C 14:1 9c                         | 0         | 0         | 0           |
| C 16:0                            | 23.76     | 16.16     | 11.01       |
| C 16:1 9t                         | 0         | 0         | 0           |
| C 16:1 9c                         | 0.18      | 0.26      | 0           |
| C 17:0                            | 0.28      | 0         | 0.17        |
| C 17:1 10c                        | 0         | 0         | 0           |
| C 18:0                            | 31.59     | 2.99      | 8.23        |
| C 18:1 7+8t                       | 0.11      | 0         | 4.28        |
| C 18:1 9t                         | 0         | 0.11      | 3.33        |
| C 18:1 11t                        | 0         | 0         | 6.66        |
| C 18:1 5c+7c+12t                  | 0         | 0         | 5.03        |
| C 18:1 9c+13t                     | 30.98     | 49.24     | 23.84       |
| C 18:1 11c+15t                    | 0.87      | 2.54      | 2.05        |
| C 18:1 12c                        | 0         | 0.23      | 6.85        |
| C 18:1 13c                        | 0         | 0.10      | 0.91        |
| C 18:1 15c                        | 0         | 0         | 0.65        |
| C 18:2 tt                         | 0         | 0         | 0.78        |
| C 18:2 ct                         | 0         | 0.19      | 0           |
| C 18:2 tc                         | 0         | 0.11      | 0           |
| C 18:2 cc                         | 9.67      | 19.96     | 7.56        |
| C 18:3 ttt                        | 0         | 0         | 0           |
| C 20:0                            | 1.10      | 0.55      | 0.31        |
| C 18:3 tet                        | 0         | 0         | 0           |
| C 18:3 ctt                        | 0         | 0         | 0           |
| C 18:3 ctc                        | 0         | 0.09      | 0           |
| C 18:3 tcc                        | 0         | 0.19      | 0           |
| C 18:3 ccc                        | 1.16      | 5.03      | 1.00        |
| C 20:1 11c                        | 0         | 0.84      | 0.21        |
| Unspecified unsaturated cis/trans | 0         | 0         | 11.01       |
| Other unknown fatty acids         | 0.14      | 1.04      | 6.03        |
